# Supplementary material for: Microglial activation is inhibited by selective anti-seizure medications
Source: Inflamm Res. 2025 Aug 23;74(1):112. doi: 10.1007/s00011-025-02076-7 (PMC12374903; doi:10.1007/s00011-025-02076-7)
Supplement: Supplementary file 1 — Supplementary file1 (XLSX 26 kb) [file 11_2025_2076_MOESM1_ESM.xlsx]

## Sheet: Material list
	Material						Company			Reference Number
	Cell culture materials and reagents
	T-75 Cell Culture Flasks						Greiner CELLSTAR®			658175
	Cell Culture Dish						Falcon™			353003
	Conical Centrifuge Tubes 15 mL						Falcon™			352096
	High Clarity Conical Centrifuge Tubes						Falcon™			352070
	Hanks Balaced Salt Solution (HBSS)						Gibco™			14185045
	DMEM, high glucose, pyruvate						Gibco™			41966029
	Macrophage-SFM						Gibco™			12065074
	Penicillin-Streptomycin (10,000 U/mL)						Gibco™			15140122
	Fetal Bovine Serum						Gibco™			10500064
	Trypsin (2.5%), no phenol red						Gibco™			9003-98-9
	Cell Strainer 70 μm						Falcon™			352350
	Poly-DL-ornithine hydrobromide						Sigma-Aldrich®			P8638
	Coverslips, round, 14 mm⌀						Assistant®			41001114
	Cell Culture Multiwell Plate, 24 Well						Greiner CELLSTAR®			662160
	DNase I (RNase-free)						New England Biolabs®			M0303S
	Medications, stimulants and toxins
	Lipopolysaccharides (LPS), E. coli serotype O111:B4						New England Biolabs®			14011S
	Polyinosinic-polycytidylic acid (PolyI:C)						Enzo Life Sciences			ALX746021M002
	Cannabidiol						Cayman Chemical			Cay-90080
	Cenobamate						Angelini Pharma			direct request
	GS967						Selleck Chemicals			S5274
	D-(+)-Fenfluramine hydrochloride						NeoBiotech			NB-48-0296
	Phenytoin						Merck			P1290000
	Stiripentol						Sigma-Aldrich®			S6826
	Tetrodotoxin citrate						Tocris Bioscience			1069
	µ-Conotoxin KIIIA						Alomone Labs©			C-280
	β-Pompilidotoxin						Alomone Labs©			P-180
	Phrixotoxin-3						Alomone Labs©			STP-720
	DMSO						Sigma-Aldrich®			D2650
	Staining
	Bovine Serum Albumin (BSA)						Sigma-Aldrich®			A9647
	Donkey Serum						Sigma-Aldrich®			D9663
	Anti-IBA1 polyclonal antibody, Rabbit,						Fujifilm Wako			019-19741			Used dilutions 1:1000 for Immunocytochemistry; 1:2000 for Immunohistochemistry
	Anti-IBA1 polyclonal antibody, Goat						Abcam©			ab5076			Used dilutions 1:600 for Immunocytochemistry
	Anti-GFAP polyclonal antibody, Chicken						Abcam©			ab4674			Used dilutions 1:5000 for Immunocytochemistry
	Anti-Nav1.2 Na+ Channel Antibody (K69/3), Mouse						NeuroMab			75-024			Used dilution 1:500 for Immunocytochemistry and Immunohistochemistry
	Anti-NG2 antibody, Rabbit						Abcam©			ab129051			Used dilution 1:600 for Immunocytochemistry
	Anti-Tuj1 antibody (anti-tubulin beta III isoform), Mouse						Merck			MAB1637			Used dilution 1:500 for Immunocytochemistry
	Anti-Myelin basic protein, Rabbit						Cell Signaling Technology®			78896			Used dilution 1:750 for Immunocytochemistry
	Donkey anti-Chicken IgY (H+L) Highly Cross Adsorbed Secondary Antibody, 488						Alexa Fluor™, Invitrogen			A78948			Used dilutions 1:1000 for Immunocytochemistry
	Donkey anti-Rabbit IgG (H+L) Highly Cross-Adsorbed Secondary Antibody, 568						Alexa Fluor™, Invitrogen			A10042			Used dilutions 1:1000 for Immunocytochemistry; 1:500 for Immunohistochemistry
	Donkey anti-Mouse IgG (H+L) Highly Cross-Adsorbed Secondary Antibody, 488						Alexa Fluor™, Invitrogen			A21202			Used dilutions 1:1000 for Immunocytochemistry; 1:500 for Immunohistochemistry
	Cy™3 AffiniPure® Donkey Anti-Goat IgG (H+L)						Jackson ImmunoResearch			705-165-147			Used dilution for Immunocytochemistry 1:600
	4′,6-diamidino-2-phenylindole (DAPI)						BD Pharmingen™			564907			Used dilution 1:1000
	Fluoromount-G®						Southern Biotech			0100-01
	Sakura OCT 4583 cryo tissue embedding compound						Sakura			16-004004
	Triton® X 100						Carl Roth®			3051.4
	Kits and Material
	NucleoSpin RNA XS Kit						Macherey-Nagel			740902250
	iScript™ cDNA Synthesis Kit						Bio-Rad			1708891
	iTaq™ Universal SYBR® Green Supermix						Bio-Rad			1725122
	MicroAmp™ Fast Optical 96-Well Reaction Plate with Barcode, 0.1 mL						Applied Biosystems™			4346906
	MicroAmp™ Optical Adhesive Film						Applied Biosystems™			4311971
	StepOnePlus® Real-Time PCR System						Applied Biosystems™			REF: 4376592
	Proteome Profiler Mouse Cytokine Array Kit, Panel A						R&D systems®			ARY006
	100 bp DNA Ladder						Invitrogen (Thermo Fisher Scientific)			15628019

## Sheet: Primer
	Target				Forward Sequence				Reverse Sequence				Source
	Primer used for RT-qPCR
	PTGS2				TCATTCACCAgACAgATTgCT				AAgCgTTTgCggTACTCATT				Boccazzi M, Van Steenwinckel J et al. Feb. 2021
	TNFα				gCCTCTTCTCATTCCTgCTT				AgggTCTgggCC ATAgAACT				Bokobza C, Joshi P et al.Jan 2022
	IFNβ				gTCCTCAACTgCTCTCCACT				CCTgCAACCACCACTCATTC				Boccazzi M, Van Steenwinckel J et al. Feb. 2021
	RPL13a				ACAgCCACTCTggAggAgAA				gAgTCCgTTggTCTTgAggA				Boccazzi M, Van Steenwinckel J et al. Feb. 2021
	Scn2a (Nav1.2)				gggAACgCCCATCAAAgAAg				ACgCTATCgTAggAAggTgg				Gould E, Kim JH. Sep 2021
	Scn3a (Nav1.3)				AggCATgAgggTggTTgTgAACg				CAgAAgATgAggCACACCAgTAgC				Gould E, Kim JH. Sep 2021
	Scn8a (Nav1.6)				AgATTTAgCgCCACTCCTgC				ggACCATTCgggAgggTTAC				Lamar T, Vanoye CG et al. Feb 2017
	Primer used for isoform detection
	Scn1a (Nav1.1)				CAgTTTAACAgCAAATgCCTTgggTT				AAgTACAAATACATgTACAggCTTTCCTCATACTTA				Han Z, Chen C et al. Aug 2020
	Scn8a (Nav1.6)				AAATggACAgCCTATggCTTC				TCACCTCgTCgATTTCgAACCg				Plummer NW, McBurney MW et al. Sep 1997
	Boccazzi M, Van Steenwinckel J, Schang AL, Faivre V, Le Charpentier T, Bokobza C, Csaba Z, Verderio C, Fumagalli M, Mani S, Gressens P. The immune-inflammatory response of oligodendrocytes in a murine model of preterm white matter injury: the role of TLR3 activation. Cell Death Dis. 2021 Feb 8;12(2):166. doi: 10.1038/s41419-021-03446-9. PMID: 33558485; PMCID: PMC7870670.
	Bokobza C, Joshi P, Schang AL, Csaba Z, Faivre V, Montané A, Galland A, Benmamar-Badel A, Bosher E, Lebon S, Schwendimann L, Mani S, Dournaud P, Besson V, Fleiss B, Gressens P, Van Steenwinckel J. miR-146b Protects the Perinatal Brain against Microglia-Induced Hypomyelination. Ann Neurol. 2022 Jan;91(1):48-65. doi: 10.1002/ana.26263. Epub 2021 Nov 26. PMID: 34741343; PMCID: PMC9298799.
	Gould E, Kim JH. SCN2A contributes to oligodendroglia excitability and development in the mammalian brain. Cell Rep. 2021 Sep 7;36(10):109653. doi: 10.1016/j.celrep.2021.109653. PMID: 34496232; PMCID: PMC8486143.
	Lamar T, Vanoye CG, Calhoun J, Wong JC, Dutton SBB, Jorge BS, Velinov M, Escayg A, Kearney JA. SCN3A deficiency associated with increased seizure susceptibility. Neurobiol Dis. 2017 Jun;102:38-48. doi: 10.1016/j.nbd.2017.02.006. Epub 2017 Feb 22. PMID: 28235671; PMCID: PMC5446790.
	Han Z, Chen C, Christiansen A, Ji S, Lin Q, Anumonwo C, Liu C, Leiser SC, Meena, Aznarez I, Liau G, Isom LL. Antisense oligonucleotides increase Scn1a expression and reduce seizures and SUDEP incidence in a mouse model of Dravet syndrome. Sci Transl Med. 2020 Aug 26;12(558):eaaz6100. doi: 10.1126/scitranslmed.aaz6100. PMID: 32848094.
	Plummer NW, McBurney MW, Meisler MH. Alternative splicing of the sodium channel SCN8A predicts a truncated two-domain protein in fetal brain and non-neuronal cells. J Biol Chem. 1997 Sep 19;272(38):24008-15. doi: 10.1074/jbc.272.38.24008. PMID: 9295353.

## Sheet: Medication Trials
	Substance		Vehicle		Stock concentrations		preliminary trial concentrations				finally used concentration				Supplier
	Cannabidiol		DMSO		150 mM		0.1, 1, 10 μM				10 μM				Cayman Chemical
	GS967		DMSO		50 mM		3, 10, 30 μM				10, 30 μM				Selleck Chemicals
	Phenytoin		DMSO		90 mM		8, 40, 100 μM				8, 40 μM				Merck
	Stiripentol		DMSO		194.89 mM		10, 50, 100, 250 μM				250 μM				Sigma-Aldrich
	Cenobamate		DMSO		300 mM		100, 300, 500, 900 μM				300, 900 μM				Angelini Pharma
	Fenfluramine		sterile MilliQ (H2O)		1.5 mM		0.1, 1, 10, 50, 100 μM				50 μM				NeoBiotech
	µ-Conotoxin KIIIA		sterile MilliQ (H2O)		1 mM		0.5, 1, 5 μM				1 μM				Alomone Labs
	β-Pompilidotoxin		sterile MilliQ (H2O)		5 mM		1, 2.5, 5 μM				2.5 μM				Alomone Labs
	Tetrodotoxin		sterile MilliQ (H2O)		2 mM		0.1, 1, 5, 10, 50 μM				1 μM				Tocris
	Phrixotoxin-3		sterile MilliQ (H2O)		0.2 mM		0.05, 0.1, 0.5 μM				0.5 μM				Alomone Labs
